# Supplementary material for: Untargeted Lipidomics Reveals Characteristic Biomarkers in Patients with Ankylosing Spondylitis Disease
Source: MDPI journal article supplement (doi:10.3390/biomedicines11010047), 2022-12-25
Supplement: s1 [file s1]

# Supplementary material

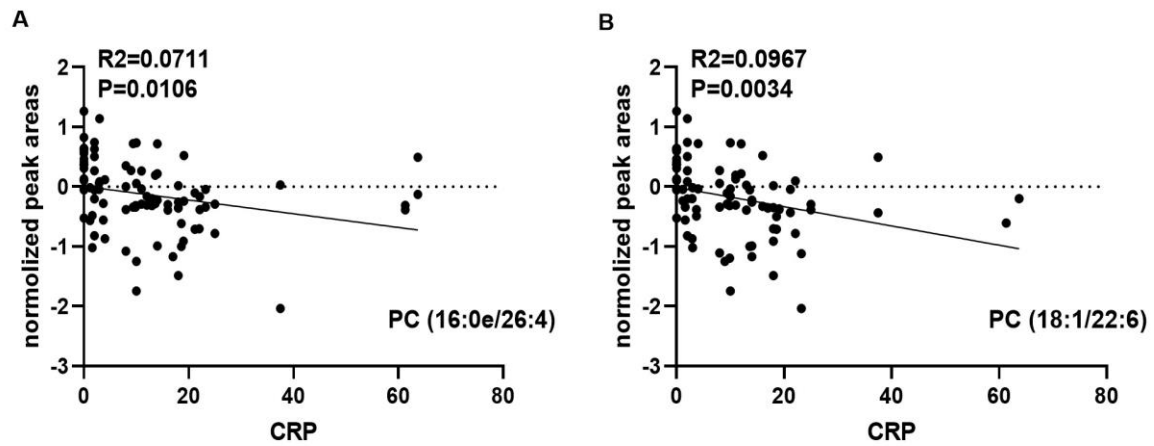

**Figure S1.** Correlation analysis between PC(16:0e/26:4), PC(18:1/22:6) and CRP. (A)Spearman correlation analysis between PC(16:0/26:4) and CRP. (B) Spearman correlation analysis between PC(18:1/22:6) and CRP. .
